# Supplementary material for: Precision MRI Phenotyping Enables Detection of Small Changes in Body Composition for Longitudinal Cohorts
Source: bioRxiv or medRxiv preprint supplement (doi:10.1101/2021.08.29.21262790), 2022-02-18
Supplement: Supplementary file [file media-1.pdf]

# **Two years later – changes in abdominal organs: First observations from the UK Biobank longitudinal imaging study**

**Brandon Witcher<sup>1</sup>, Marjola Thanaj<sup>1</sup>, Madeleine Cule<sup>2</sup>, Yi Liu<sup>3</sup>, Nicolas Basty<sup>1</sup>, Elena P. Sorokin<sup>2</sup>, Jimmy D. Bell<sup>1</sup>, and E. Louise Thomas<sup>1,\*</sup>**

<sup>1</sup>Research Centre for Optimal Health, School of Life Sciences, University of Westminster, London, UK

<sup>2</sup>Calico Life Sciences LLC, South San Francisco, California, USA

<sup>3</sup>Waymo LLC, Mountain View, California, USA

\*l.thomas3@westminster.ac.uk

## **ABSTRACT**

## Supplementary Information

|                          | Women          |                           | Men            |                           |
|--------------------------|----------------|---------------------------|----------------|---------------------------|
|                          | Baseline       | <i>p</i> -value           | Baseline       | <i>p</i> -value           |
| <i>N</i>                 | 23,742         |                           | 22,167         |                           |
| <i>N</i> (Cheadle)       | 13,912         |                           | 13,399         |                           |
| <i>N</i> (Newcastle)     | 5,966          |                           | 5,311          |                           |
| Age                      | 63.2 ± 7.52    | 1.1 × 10 <sup>-05</sup> * | 64.7 ± 7.78    | 2.4 × 10 <sup>-10</sup> * |
| Weight (kg)              | 69.49 ± 13.48  | 0.0572                    | 84.12 ± 13.77  | 0.0132                    |
| Height (cm)              | 162.55 ± 6.25  | 0.2174                    | 175.86 ± 6.61  | 8.5 × 10 <sup>-05</sup> * |
| BMI (kg/m <sup>2</sup> ) | 26.3 ± 4.89    | 0.0025                    | 27.18 ± 4.03   | 6.7 × 10 <sup>-07</sup> * |
| Waist Circumference (cm) | 83.48 ± 11.98  | 0.0214                    | 94.9 ± 10.89   | 9 × 10 <sup>-05</sup> *   |
| Hip Circumference (cm)   | 101.54 ± 9.96  | 0.0349                    | 101.26 ± 7.38  | 3.2 × 10 <sup>-06</sup> * |
| Waist-to-Hip Ratio       | 0.82 ± 0.07    | 0.4512                    | 0.94 ± 0.06    | 0.2387                    |
| Systolic BP (mm Hg)      | 136.57 ± 19.33 | 0.0865                    | 142.46 ± 17.34 | 0.1413                    |
| Diastolic BP (mm Hg)     | 77.59 ± 9.91   | 5.4 × 10 <sup>-08</sup> * | 80.92 ± 9.75   | 0.0023                    |
| Grip Strength (kg)       | 21.5 ± 5.78    | 0.0535                    | 36.17 ± 8.58   | 0.00068                   |

**Table S1.** Baseline-imaging cohort for the Cheadle and Newcastle sites. *P*-values represent group comparisons between the baseline cohorts from Table 3. An asterisk (\*) indicates the *p*-value is below the significance threshold adjusted for multiple comparisons. BMI: body mass index; BP: blood pressure.

| Trait                                                                                                             | SNOMED                                        | ICD9                                                                                 | ICD10                                 | Field 20002                            | Field 20001      | Other Fields |
|-------------------------------------------------------------------------------------------------------------------|-----------------------------------------------|--------------------------------------------------------------------------------------|---------------------------------------|----------------------------------------|------------------|--------------|
| Cardiovascular disease<br>(defined by myocardial infraction,<br>stroke and heart failure)                         | 22298006<br>230690007<br>84114007             | 410-412 4289                                                                         | I20-I25 I60-I64                       | 1074 1075 1076 1081 <br>1086 1491 1583 |                  |              |
| Liver disease<br>(defined by chronic viral hepatitis,<br>malignant liver disease,<br>NAFLD and hepatic cirrhosis) | 235856003<br>3738000<br>197315008<br>19943007 | 0700 0702 0703 <br>0704 0709 155 <br>1551 5715 57151 <br>5716 5718 573 <br>5731 5734 | B18 C22 K70-K77                       | 1136 1156 1158 1604                    |                  |              |
| Kidney disease<br>(defined by chronic kidney disease<br>and end-stage renal disease)                              | 709044004<br>46177005                         | 585 5859                                                                             | N180-N185 N188 <br>N189               | 1192 1193                              |                  |              |
| Type 1 diabetes mellitus                                                                                          | 46635009                                      | 25001                                                                                | E10 E100-E109                         | 1222                                   |                  |              |
| Type 2 diabetes mellitus                                                                                          | 44054006                                      | 25000                                                                                | E11 E110-E119                         | 1220 1223                              |                  |              |
| Cancer (all types)                                                                                                | 363346000                                     | Type of cancer ICD9<br>(Field 40013)                                                 | Type of cancer ICD10<br>(Field 40006) |                                        | All cancer codes | 2453         |
| Metabolic disorder<br>(correspond to carbohydrates<br>and lipids)                                                 | 75934005                                      | 272                                                                                  | E70-E90                               |                                        |                  |              |
| Menopause                                                                                                         | 289903006                                     | 6272                                                                                 | N951                                  | 1665                                   |                  | 2724         |

**Table S2.** Definitions for disease/physiological conditions for cardiovascular disease, liver disease, kidney disease, type-1 and type-2 diabetes mellitus, any cancer, metabolic disorder and menopause. Field 20001: self-reported cancer illness; Field 20002: self-reported non-cancer illness; ICD9: International Classification of Diseases 9th edition; ICD10 International Classification of Diseases 10th edition.

|                                    | <i>Dependent variable:</i> |                     |                     |                     |                       |                        |                     |
|------------------------------------|----------------------------|---------------------|---------------------|---------------------|-----------------------|------------------------|---------------------|
|                                    | Total Muscle               | Iliopsoas Muscle    | Total Muscle        | Total Kidney        | Liver                 | Total Lung             | Total Kidney        |
|                                    | (1)                        | (2)                 | (3)                 | (4)                 | (5)                   | (6)                    | (7)                 |
| Intercept                          | 16.00***<br>(0.07)         | 525.30***<br>(3.19) | 15.98***<br>(0.07)  | 261.47***<br>(1.75) | 1,323.56***<br>(7.48) | 2,271.65***<br>(22.20) | 261.70***<br>(1.74) |
| Sex [Male]                         | 5.87***<br>(0.10)          | 218.77***<br>(4.63) | 5.89***<br>(0.10)   | 56.81***<br>(2.60)  | 140.44***<br>(11.17)  | 690.36***<br>(33.16)   | 56.74***<br>(2.60)  |
| Age                                | -0.10***<br>(0.005)        | -4.39***<br>(0.22)  | -0.10***<br>(0.005) | -1.38***<br>(0.12)  | -8.98***<br>(0.49)    | 5.42***<br>(1.46)      | -1.37***<br>(0.12)  |
| BMI                                | 0.53***<br>(0.02)          | 15.00***<br>(0.65)  | 0.53***<br>(0.02)   | 4.32***<br>(0.39)   | 38.25***<br>(1.73)    | 23.34***<br>(5.13)     | 4.33***<br>(0.39)   |
| Site                               | -0.32***<br>(0.07)         | -5.26<br>(3.17)     | -0.31***<br>(0.07)  | -1.02<br>(1.67)     | -9.91<br>(6.80)       | -6.38<br>(20.19)       | -0.99<br>(1.67)     |
| Systolic BP                        | 0.002<br>(0.001)           | 0.04<br>(0.05)      | 0.002<br>(0.001)    | 0.06<br>(0.03)      | 0.48*<br>(0.17)       | -0.15<br>(0.53)        | 0.06<br>(0.03)      |
| Diastolic BP                       | -0.001<br>(0.002)          | -0.07<br>(0.08)     | -0.001<br>(0.002)   | -0.06<br>(0.06)     | 0.03<br>(0.31)        | -1.03<br>(0.94)        | -0.06<br>(0.06)     |
| ASAT Volume                        | -0.36***<br>(0.02)         | -10.75***<br>(0.66) | -0.36***<br>(0.02)  | -0.93*<br>(0.41)    | -19.19***<br>(1.84)   | -62.04***<br>(5.50)    | -0.94*<br>(0.41)    |
| VAT Volume                         | -0.06*<br>(0.02)           | 3.19**<br>(0.96)    | -0.06*<br>(0.02)    | 0.63<br>(0.58)      | -5.76*<br>(2.62)      | -68.52***<br>(7.52)    | 0.69<br>(0.58)      |
| Grip Strength                      | 0.02***<br>(0.002)         | 0.68***<br>(0.08)   | 0.02***<br>(0.002)  |                     |                       |                        |                     |
| Diagnosis [T2DM]                   | -0.54**<br>(0.16)          | -22.31*<br>(7.55)   |                     |                     |                       |                        |                     |
| Diagnosis [CVD]                    |                            |                     | -0.28*<br>(0.14)    | 4.51<br>(3.43)      |                       |                        |                     |
| Liver Iron                         |                            |                     |                     |                     | -30.57***<br>(7.99)   |                        |                     |
| Liver PDFF                         |                            |                     |                     |                     | 17.24***<br>(0.67)    |                        |                     |
| Diagnosis [Metabolic]              |                            |                     |                     |                     | 5.38<br>(14.90)       | -76.38<br>(44.41)      |                     |
| Diagnosis [Liver]                  |                            |                     |                     |                     |                       |                        | 10.20<br>(7.71)     |
| Re-imaging Visit                   | 0.04*<br>(0.02)            | 0.47<br>(0.75)      | 0.03<br>(0.02)      | 0.42<br>(0.52)      | 15.10***<br>(2.74)    | -25.40*<br>(8.30)      | 0.27<br>(0.51)      |
| Diagnosis [T2DM] * Re-imaging      | -0.17*<br>(0.07)           | -5.21*<br>(2.59)    |                     |                     |                       |                        |                     |
| Diagnosis [CVD] * Re-imaging       |                            |                     | -0.05<br>(0.05)     | -3.05<br>(1.65)     |                       |                        |                     |
| Diagnosis [Metabolic] * Re-imaging |                            |                     |                     |                     | -23.48*<br>(9.38)     | 98.19**<br>(28.59)     |                     |
| Diagnosis [Liver] * Re-imaging     |                            |                     |                     |                     |                       |                        | -8.39*<br>(3.66)    |
| Participants                       | 2,974                      | 2,966               | 2,974               | 2,989               | 2,993                 | 2,994                  | 2,989               |
| Adjusted ICC                       | 0.95                       | 0.96                | 0.95                | 0.92                | 0.84                  | 0.83                   | 0.92                |
| BIC                                | 15,141                     | 50,247              | 15,159              | 47,126              | 61,762                | 72,446                 | 47,121              |

Note:

\*p<0.05; \*\*p<0.001; \*\*\*p<0.00028

**Table S3.** Summary of regression coefficients for the linear mixed-effects models in Table 2. Standard errors are provided underneath the regression coefficients. Indicators are appended to the regression coefficients when the *p*-value is less than 0.05 \*, 0.001 \*\* and 0.00028 \*\*\* (Bonferroni corrected). All volumes are in milliliters (ml), except for total muscle, ASAT and VAT which are in liters (l). ASAT: abdominal subcutaneous adipose tissue; BIC: Bayesian information criterion; BMI: body mass index; BP: blood pressure; CVD: cardiovascular disease; ICC: intraclass correlation coefficient; PDFF: proton density fat fraction; T2DM: type-2 diabetes mellitus; VAT: visceral adipose tissue.
